# Supplementary material
Source: ML conference proceedings conference paper supplement (https://proceedings.mlr.press/v84/laude18a.html)
Supplement: Supplementary file [file laude18a-supp.pdf]

---

# A Nonconvex Proximal Splitting Algorithm under Moreau-Yosida Regularization –Supplementary Material–

---

Emanuel Laude

Tao Wu

Daniel Cremers

Department of Informatics, Technical University of Munich, Germany

## A Proofs

### A.1 Proof of Lemma 1

*Proof.* (Statements 1 & 2) To show the lower boundedness of  $\mathfrak{Q}_\rho(u^{t+1}, z^{t+1}, y^{t+1})$  we rewrite

$$\begin{aligned} \mathfrak{Q}_\rho(u^{t+1}, z^{t+1}, y^{t+1}) &= f(z^{t+1}) + g(u^{t+1}) \\ &\quad + \frac{\rho}{2} \|Au^{t+1} - z^{t+1} - \lambda y^{t+1}\|^2 \\ &\quad + \frac{1}{2\lambda} \|Au^{t+1} - z^{t+1}\|^2 \\ &\quad - \frac{1}{2\lambda} \|Au^{t+1} - z^{t+1} - \lambda y^{t+1}\|^2. \end{aligned}$$

We define the quadratic penalty

$$Q(u, z) = f(z) + g(u) + \frac{1}{2\lambda} \|Au - z\|^2. \quad (1)$$

Since  $\rho > \frac{1}{\lambda}$  we can further bound  $\mathfrak{Q}_\rho(u^{t+1}, z^{t+1}, y^{t+1})$  from below by  $Q(u^{t+1}, z^{t+1})$ :

$$\mathfrak{Q}_\rho(u^{t+1}, z^{t+1}, y^{t+1}) \geq Q(u^{t+1}, z^{t+1}).$$

We further bound  $Q(u^{t+1}, z^{t+1})$ :

$$Q(u^{t+1}, z^{t+1}) \geq \epsilon_\lambda f(Au^{t+1}) + g(u^{t+1}),$$

which is bounded from below.

(Statement 3) We find an estimate for  $\mathfrak{Q}_\rho(u^{t+1}, z^t, y^t) - \mathfrak{Q}_\rho(u^t, z^t, y^t)$ . By the definition of  $u^{t+1}$  as the global minimum of  $\mathfrak{Q}_\rho(\cdot, z^t, y^t) + \frac{1}{2} \|(\cdot) - u^t\|_M^2$  and  $M := \frac{1}{\sigma} I - \rho A^\top A$  positive definite for  $\sigma\rho\|A\|^2 < 1$ , we have the estimate

$$\mathfrak{Q}_\rho(u^{t+1}, z^t, y^t) + \frac{1}{2} \|u^{t+1} - u^t\|_M^2 \leq \mathfrak{Q}_\rho(u^t, z^t, y^t).$$

We bound  $\frac{1}{2} \|u^{t+1} - u^t\|_M^2$ ,

$$\begin{aligned} \|u^{t+1} - u^t\|_M^2 &= \langle u^{t+1} - u^t, M(u^{t+1} - u^t) \rangle \\ &= \frac{1}{\sigma} \|u^{t+1} - u^t\|^2 - \rho \|Au^{t+1} - Au^t\|^2 \\ &\geq \left( \frac{1}{\sigma} - \rho\|A\|^2 \right) \|u^{t+1} - u^t\|^2. \end{aligned}$$

This yields the estimate

$$\begin{aligned} \mathfrak{Q}_\rho(u^{t+1}, z^t, y^t) - \mathfrak{Q}_\rho(u^t, z^t, y^t) \\ \leq \left( \frac{\rho\|A\|^2}{2} - \frac{1}{2\sigma} \right) \|u^{t+1} - u^t\|^2, \end{aligned} \quad (2)$$

which leads to a sufficient descent if  $\sigma\rho\|A\|^2 < 1$ . The optimality for the  $z$ -update guarantees

$$\mathfrak{Q}_\rho(u^{t+1}, z^{t+1}, y^t) - \mathfrak{Q}_\rho(u^{t+1}, z^t, y^t) \leq 0. \quad (3)$$

Finally we bound the term

$$\begin{aligned} \mathfrak{Q}_\rho(u^{t+1}, z^{t+1}, y^{t+1}) - \mathfrak{Q}_\rho(u^{t+1}, z^{t+1}, y^t) &= -\frac{\lambda}{2} \|y^{t+1}\|^2 \\ &\quad + \frac{\lambda}{2} \|y^t\|^2 + \langle Au^{t+1} - z^{t+1}, y^{t+1} - y^t \rangle \\ &\quad + \frac{\rho}{2} \|Au^{t+1} - z^{t+1} - \lambda y^{t+1}\|^2 \\ &\quad - \frac{\rho}{2} \|Au^{t+1} - z^{t+1} - \lambda y^t\|^2. \end{aligned}$$

Since  $\frac{1}{\rho}(y^{t+1} - y^t) + \lambda y^{t+1} = Au^{t+1} - z^{t+1}$ , we can rewrite

$$\begin{aligned} &= -\frac{\lambda}{2} \|y^{t+1}\|^2 + \frac{\lambda}{2} \|y^t\|^2 + \langle Au^{t+1} - z^{t+1}, y^{t+1} - y^t \rangle \\ &= -\frac{\lambda}{2} \|y^{t+1}\|^2 + \frac{\lambda}{2} \|y^t\|^2 + \frac{1}{\rho} \|y^{t+1} - y^t\|^2 + \lambda \|y^{t+1}\|^2 \\ &\quad - \lambda \langle y^{t+1}, y^t \rangle \\ &= \frac{\lambda}{2} \|y^{t+1}\|^2 - \lambda \langle y^{t+1}, y^t \rangle + \frac{\lambda}{2} \|y^t\|^2 + \frac{1}{\rho} \|y^{t+1} - y^t\|^2 \\ &= \left( \frac{1}{\rho} + \frac{\lambda}{2} \right) \|y^{t+1} - y^t\|^2. \end{aligned}$$

We apply the identity  $\|a + c\|^2 - \|b + c\|^2 = -\|b - a\|^2 + 2\langle a + c, a - b \rangle$  with  $a := -\lambda y^{t+1}$ ,  $b := -\lambda y^t$  and  $c := Au^{t+1} - z^{t+1}$  and obtain

$$\begin{aligned} &\frac{\rho}{2} \|Au^{t+1} - z^{t+1} - \lambda y^{t+1}\|^2 - \frac{\rho}{2} \|Au^{t+1} - z^{t+1} - \lambda y^t\|^2 \\ &= -\frac{\rho\lambda^2}{2} \|y^{t+1} - y^t\|^2 \\ &\quad - \lambda\rho \langle Au^{t+1} - z^{t+1} - \lambda y^{t+1}, y^{t+1} - y^t \rangle \\ &= -\frac{\rho\lambda^2 + 2\lambda}{2} \|y^{t+1} - y^t\|^2. \end{aligned}$$

Overall we have:

$$\begin{aligned} & \mathfrak{Q}_\rho(u^{t+1}, z^{t+1}, y^{t+1}) - \mathfrak{Q}_\rho(u^{t+1}, z^{t+1}, y^t) \\ &= \left( \frac{1}{\rho} - \frac{\rho\lambda^2 + \lambda}{2} \right) \|y^{t+1} - y^t\|^2. \end{aligned} \quad (4)$$

Summing (2)–(4), we obtain the desired result:

$$\begin{aligned} & \mathfrak{Q}_\rho(u^{t+1}, z^{t+1}, y^{t+1}) - \mathfrak{Q}_\rho(u^t, z^t, y^t) \\ & \leq \left( \frac{\rho\|A\|^2}{2} - \frac{1}{2\sigma} \right) \|u^{t+1} - u^t\|^2 \\ & \quad + \left( \frac{1}{\rho} - \frac{\rho\lambda^2 + \lambda}{2} \right) \|y^{t+1} - y^t\|^2. \end{aligned} \quad (5)$$

□

## A.2 Proof of Lemma 2

*Proof.* Since  $\{\mathfrak{Q}_\rho(u^t, z^t, y^t)\}_{t \in \mathbb{N}}$  monotonically decreases by Lemma 1, it is bounded from above. Since  $\{Q(u^t, z^t)\}_{t \in \mathbb{N}}$  is bounded from above by  $\{\mathfrak{Q}_\rho(u^t, z^t, y^t)\}_{t \in \mathbb{N}}$  and, furthermore,  $Q$  is coercive by assumption, we assert that  $\{u^t\}_{t \in \mathbb{N}}$ ,  $\{z^t\}_{t \in \mathbb{N}}$  are uniformly bounded.

Now we sum the estimate (5) from  $t = 1$  to  $T$  and obtain due to the lower boundedness of the iterates  $\mathfrak{Q}_\rho(u^t, z^t, y^t)$ :

$$\begin{aligned} -\infty & < \mathfrak{Q}_\rho(u^{T+1}, z^{T+1}, y^{T+1}) - \mathfrak{Q}_\rho(u^1, z^1, y^1) \\ & \leq \left( \frac{\rho\|A\|^2}{2} - \frac{1}{2\sigma} \right) \sum_{t=1}^T \|u^{t+1} - u^t\|^2 \\ & \quad + \left( \frac{1}{\rho} - \frac{\rho\lambda^2 + \lambda}{2} \right) \sum_{t=1}^T \|y^{t+1} - y^t\|^2. \end{aligned}$$

Passing  $T \rightarrow \infty$  yields that  $\|u^{t+1} - u^t\| \rightarrow 0$  and  $\|y^{t+1} - y^t\| \rightarrow 0$  for  $\rho > 1/\lambda$  and  $\sigma\rho\|A\|^2 < 1$ . From  $\frac{1}{\rho}(y^{t+1} - y^t) = Au^{t+1} - z^{t+1} - \lambda y^{t+1}$  we have that,

$$\begin{aligned} 0 & \leq \|z^t - z^{t+1}\| \\ & = \|z^t - z^{t+1} + A(u^{t+1} - u^t) - A(u^{t+1} - u^t) \\ & \quad + \lambda y^{t+1} - \lambda y^t - \lambda y^{t+1} + \lambda y^t\| \\ & \leq \frac{1}{\rho} \|y^{t+1} - y^t\| + \|A\| \|u^{t+1} - u^t\| \\ & \quad + \lambda \|y^{t+1} - y^t\| \rightarrow 0, \end{aligned}$$

and that  $\|Au^t - z^t - \lambda y^t\| \rightarrow 0$ . Since  $\{u^t\}_{t \in \mathbb{N}}$ ,  $\{z^t\}_{t \in \mathbb{N}}$  are uniformly bounded, also  $\{y^t\}_{t \in \mathbb{N}}$  are uniformly bounded. □
